# Supplementary material for: Multicopy suppressor screens reveal convergent evolution of single-gene lysis proteins
Source: PubMed Central journal article supplement (PMC10229422; doi:10.1038/s41589-023-01269-7), 2023-02-20
Supplement: 41589_2023_1269_MOESM1_ESM.pdf [file 41589_2023_1269_MOESM1_ESM.pdf]

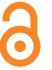

---

# Multicopy suppressor screens reveal convergent evolution of single-gene lysis proteins

---

In the format provided by the authors and unedited

---

## 1 **Supplementary information Contents:**

2  
3 **Supplementary Table 1:** Overview of Dub-seq library composition for all libraries employed in  
4 this study.

5  
6 **Supplementary Table 2:** Taxonomy information for different single strand RNA phages  
7 referenced in this work.

8  
9 **Supplementary Fig. 1:** Detailed Dub-seq suppressor screening results against Sgl<sup>M</sup>.

10  
11 **Supplementary Fig. 2:** Detailed Dub-seq suppressor screening results against Sgl<sup>Hgal1</sup>.

12  
13 **Supplementary Fig. 3:** Detailed Dub-seq suppressor screening results against Sgl<sup>Ku1</sup>.

14  
15 **Supplementary Fig. 4:** Detailed Dub-seq suppressor screening results against Sgl<sup>MS2</sup>.

16  
17 **Supplementary Fig. 5:** Detailed Dub-seq suppressor screening results against Sgl<sup>PP7</sup>.

18  
19 **Supplementary Fig. 6:** Detailed Dub-seq suppressor screening results against Sgl<sup>PRR1</sup>.

20  
21 **Supplementary Fig. 7:** Sequence alignment of *Fiersviridae* lysis proteins.

### 22 23 24 **Source data files**

25  
26 Source data file for each figure in the main text is submitted as a separate file

27

28 **Supplementary Table 1. DubSeq suppressor libraries employed in this study.**  
 29 The source genome for all libraries is BW25113 with 4509 potential genes for inclusion  
 30 in Dub-seq experiments. The original pFAB5516 Dub-seq library is included as a  
 31 reference.

| Library                               | Sgl Name? <sup>1</sup> | Established Sgl Target? | Source Phage Genome | Number Fragments | Median Fragment Length (bp) | Genes Covered? | Reference                  |
|---------------------------------------|------------------------|-------------------------|---------------------|------------------|-----------------------------|----------------|----------------------------|
| pFAB5516                              | N/A                    | N/A                     | N/A                 | 27778            | 2514                        | 4336           | PMID: 30659179             |
| <i>sgl<sup>Hgal1</sup></i> + pFAB5516 | Sgl <sup>Hgal1</sup>   | No                      | NC_019922           | 15639            | 2439                        | 3736           | This study                 |
| <i>sgl<sup>Ku1</sup></i> + pFAB5516   | Sgl <sup>Ku1</sup>     | No                      | AF227250.1          | 12916            | 2426                        | 4042           | This study                 |
| <i>sgl<sup>M</sup></i> + pFAB5516     | LysM, Sgl <sup>M</sup> | MurJ                    | NC_019707           | 17007            | 2455                        | 3846           | PMID: 28894177; This study |
| <i>sgl<sup>MS2</sup></i> + pFAB5516   | L, Sgl <sup>MS2</sup>  | No                      | NC_001417           | 16208            | 2443                        | 3802           | This study                 |
| <i>sgl<sup>PRR1</sup></i> + pFAB5516  | Sgl <sup>PRR1</sup>    | No                      | NC_008294           | 18477            | 2453                        | 3924           | This study                 |
| <i>sgl<sup>PP7</sup></i> + pFAB5516   | Sgl <sup>PP7</sup>     | No                      | NC_001628           | 20940            | 2463                        | 3968           | This study                 |

32  
 33  
 34  
 35  
 36  
 37  
 38  
 39  
 40  
 41  
 42  
 43  
 44  
 45  
 46

<sup>1</sup> Recent identification and expansion of Sgls necessitates a more systematic nomenclature for these proteins, but some have less informative common nomenclature. Here, we use a format consistent with Chamakura and Young 2020 (PMID:33075663). For instance, the Sgl from phage M is Sgl<sup>M</sup>.

47 **Supplementary Table 2. Taxonomy information for different single strand RNA**  
48 **phages referenced in this work.**

49

| <b>Phage</b> | <b>Family</b>       | <b>Genus</b>        | <b>Species</b>                 | <b>txid</b> |
|--------------|---------------------|---------------------|--------------------------------|-------------|
| Hgal1        | <i>Fiersviridae</i> | <i>Hagavirus</i>    | <i>Hagavirus psychrophilum</i> | 1206300     |
| Ku1          | <i>Fiersviridae</i> | <i>Emesvirus</i>    | <i>Emesvirus japonicum</i>     | 12021       |
| M            | <i>Fiersviridae</i> | <i>Empivirus</i>    | <i>Empivirus allolyticum</i>   | 1235640     |
| MS2          | <i>Fiersviridae</i> | <i>Emesvirus</i>    | <i>Emesvirus zinderi</i>       | 12022       |
| PP7          | <i>Fiersviridae</i> | <i>Pepevirus</i>    | <i>Pepevirus rubrum</i>        | 12023       |
| PRR1         | <i>Fiersviridae</i> | <i>Perrunavirus</i> | <i>Perrunavirus olsenii</i>    | 12024       |

50

51

52

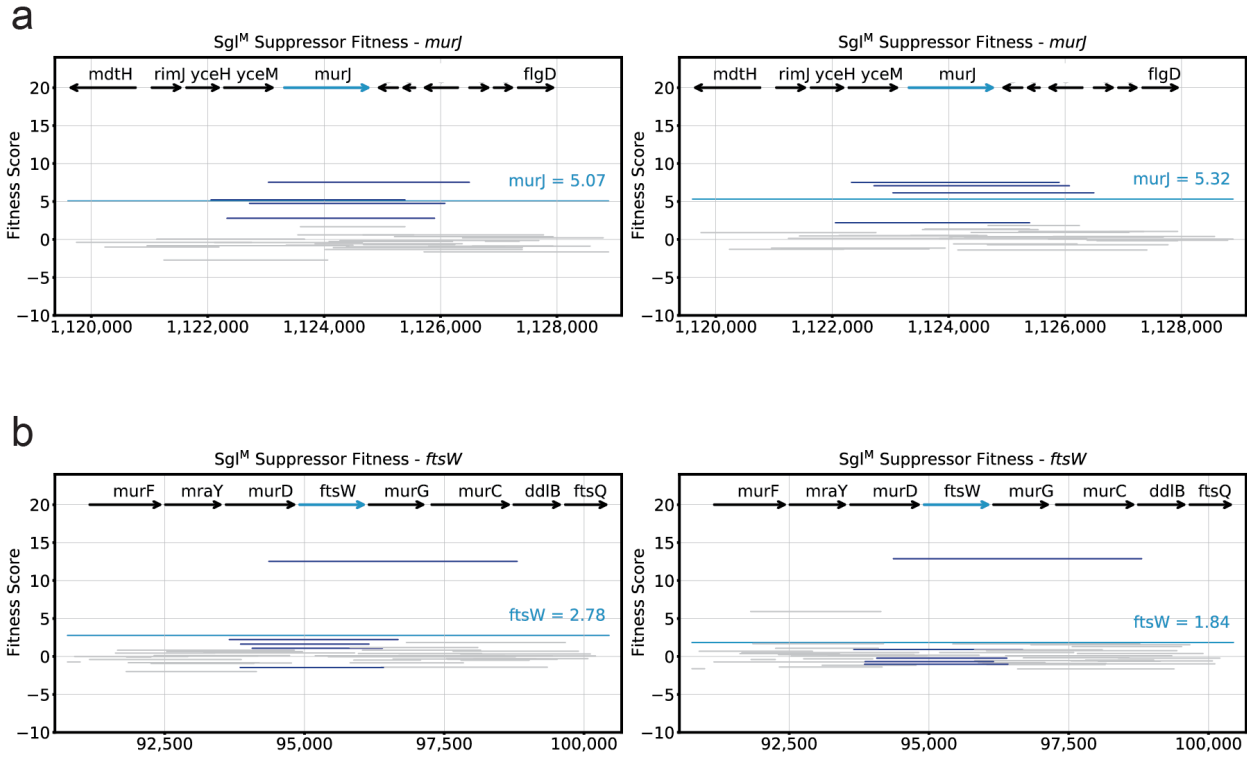

53  
54  
55  
56  
57  
58  
59  
60  
61  
62

**Supplementary Fig. 1: Detailed Dub-seq suppressor screening results against Sgl<sup>M</sup>.**

(a-b) Dub-seq plots for suppressor screening against Sgl<sup>M</sup> zoomed in on a gene of interest with experimental replicates shown side-by-side. Genes of interest are significant hits shown in Fig. 2 or candidate multi-gene multi-copy suppressors. Black arrows represent tracked ORFs during analysis. Teal arrows represent the gene of interest. Dark blue lines represent Dub-seq fragments covering the gene of interest with scores shown as *fscores*. Gray lines represent Dub-seq fragments that do not entirely cover the gene of interest with scores shown as *fscores*. Teal lines represent the gene *gscore* of the gene of interest.

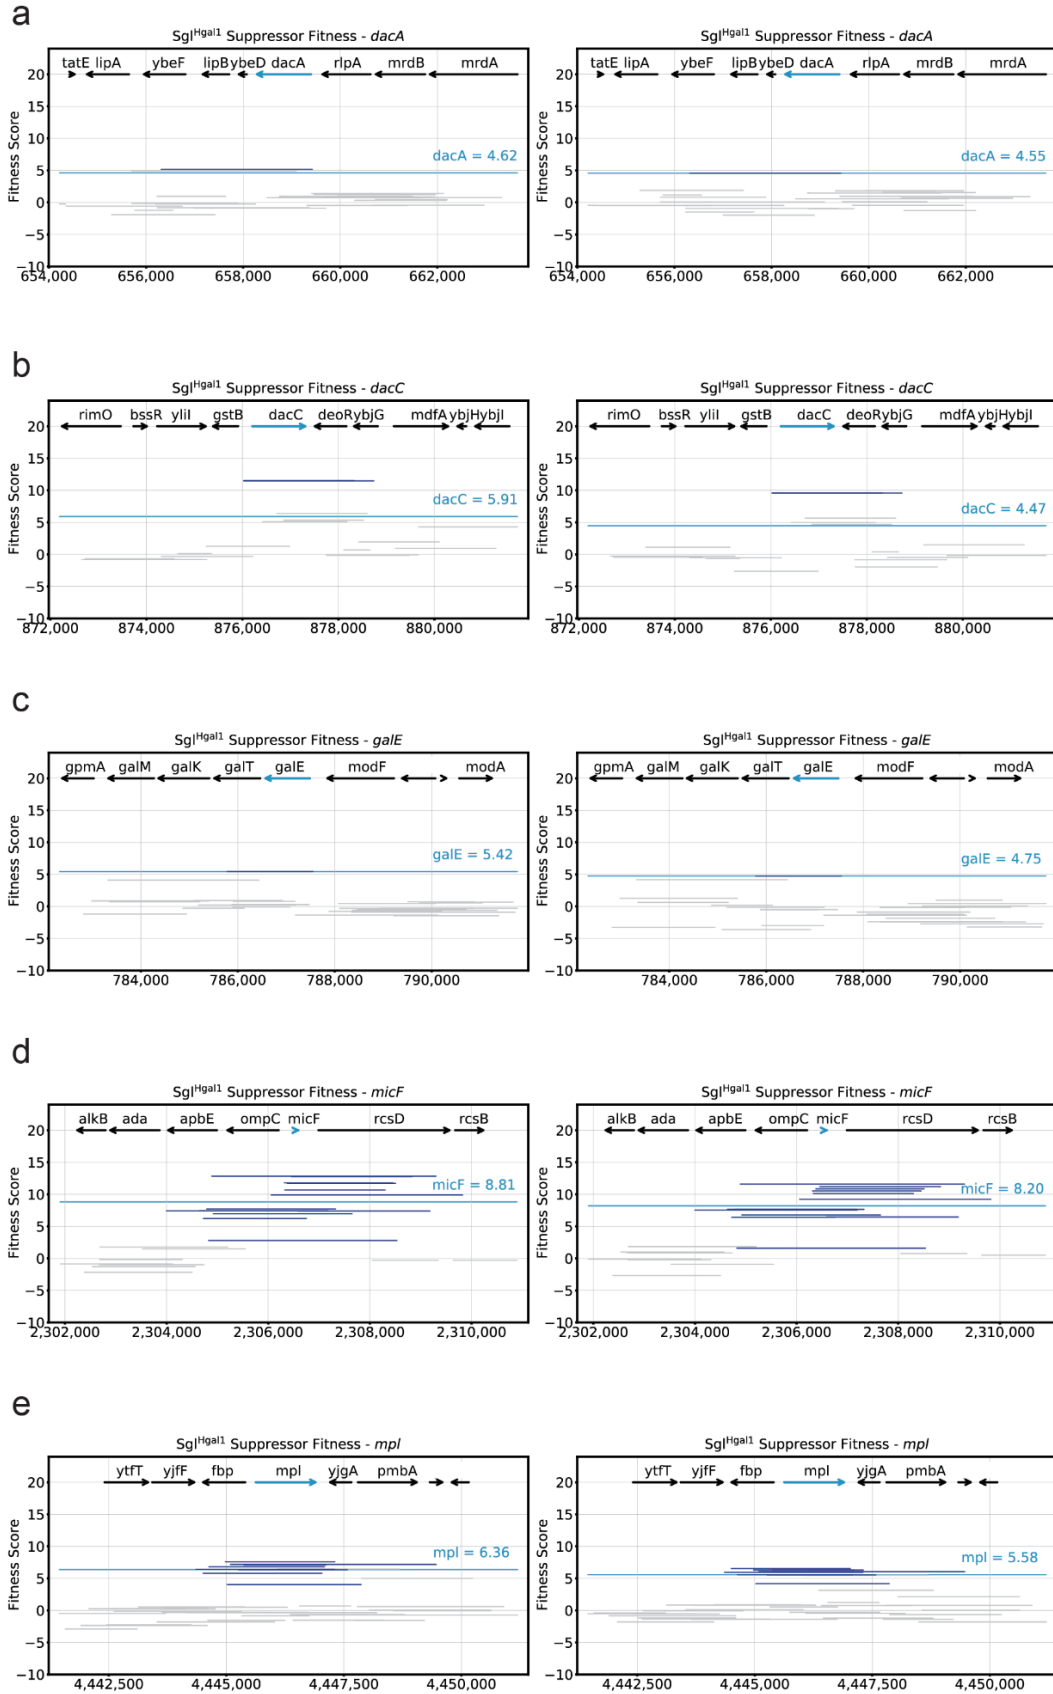

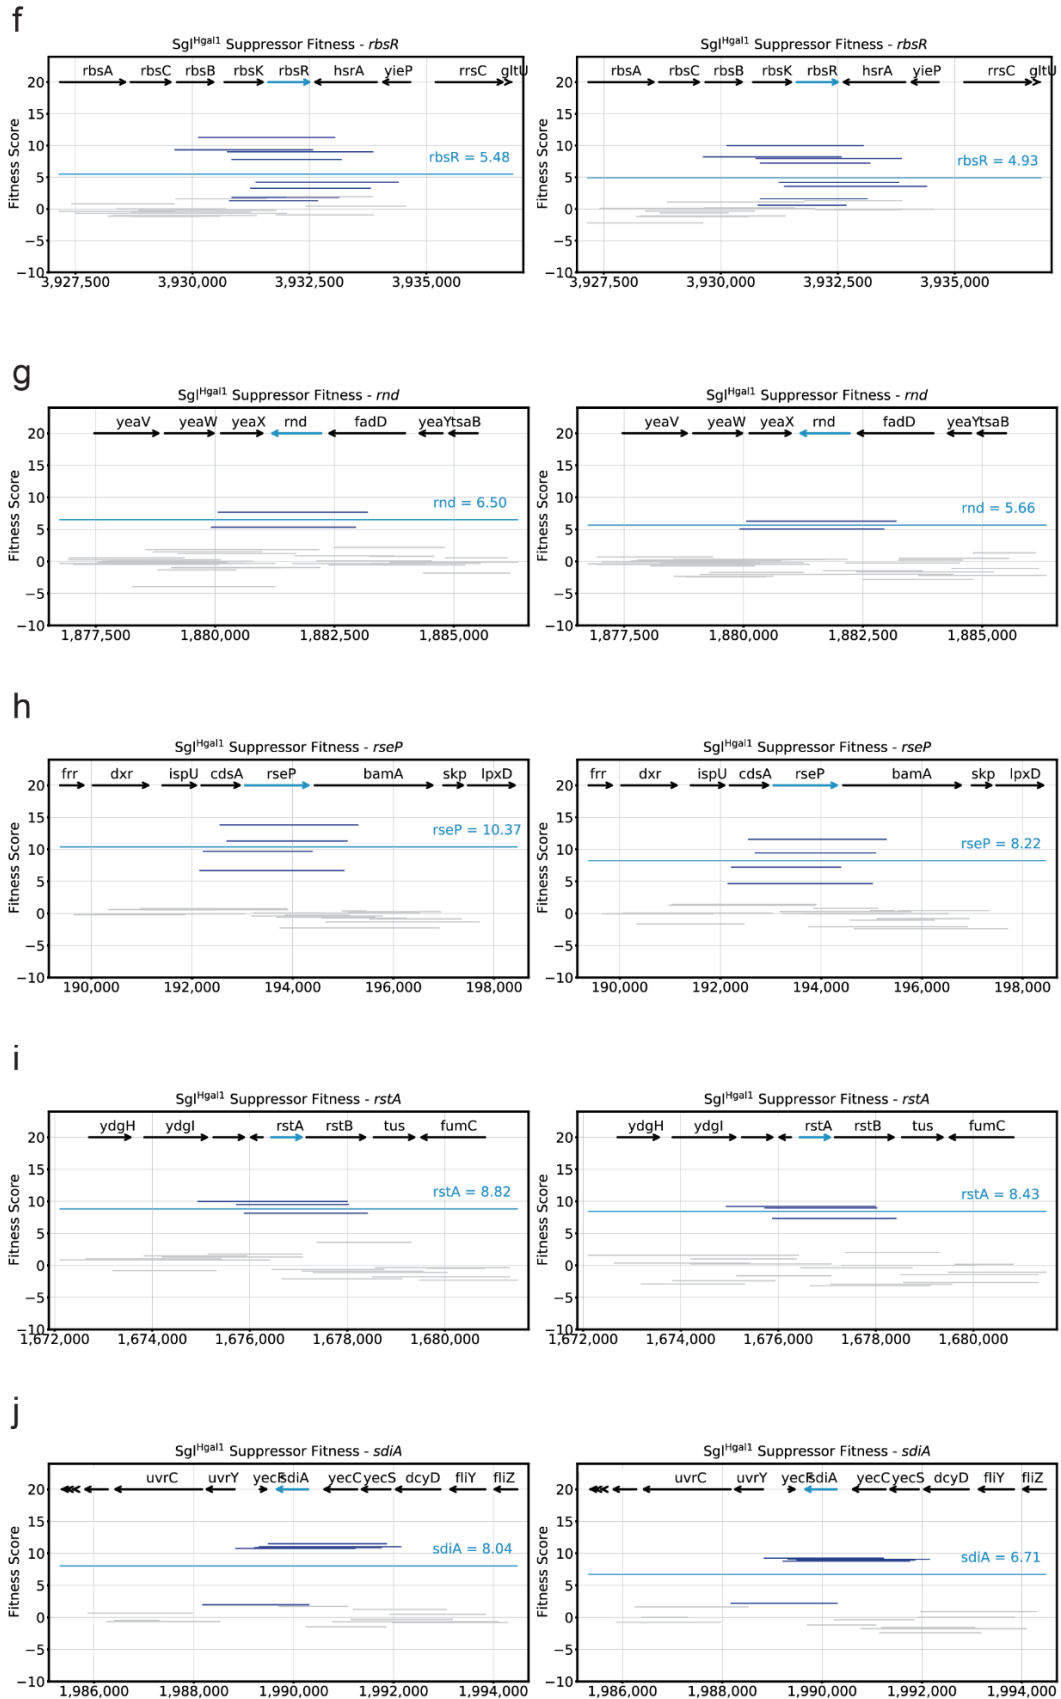

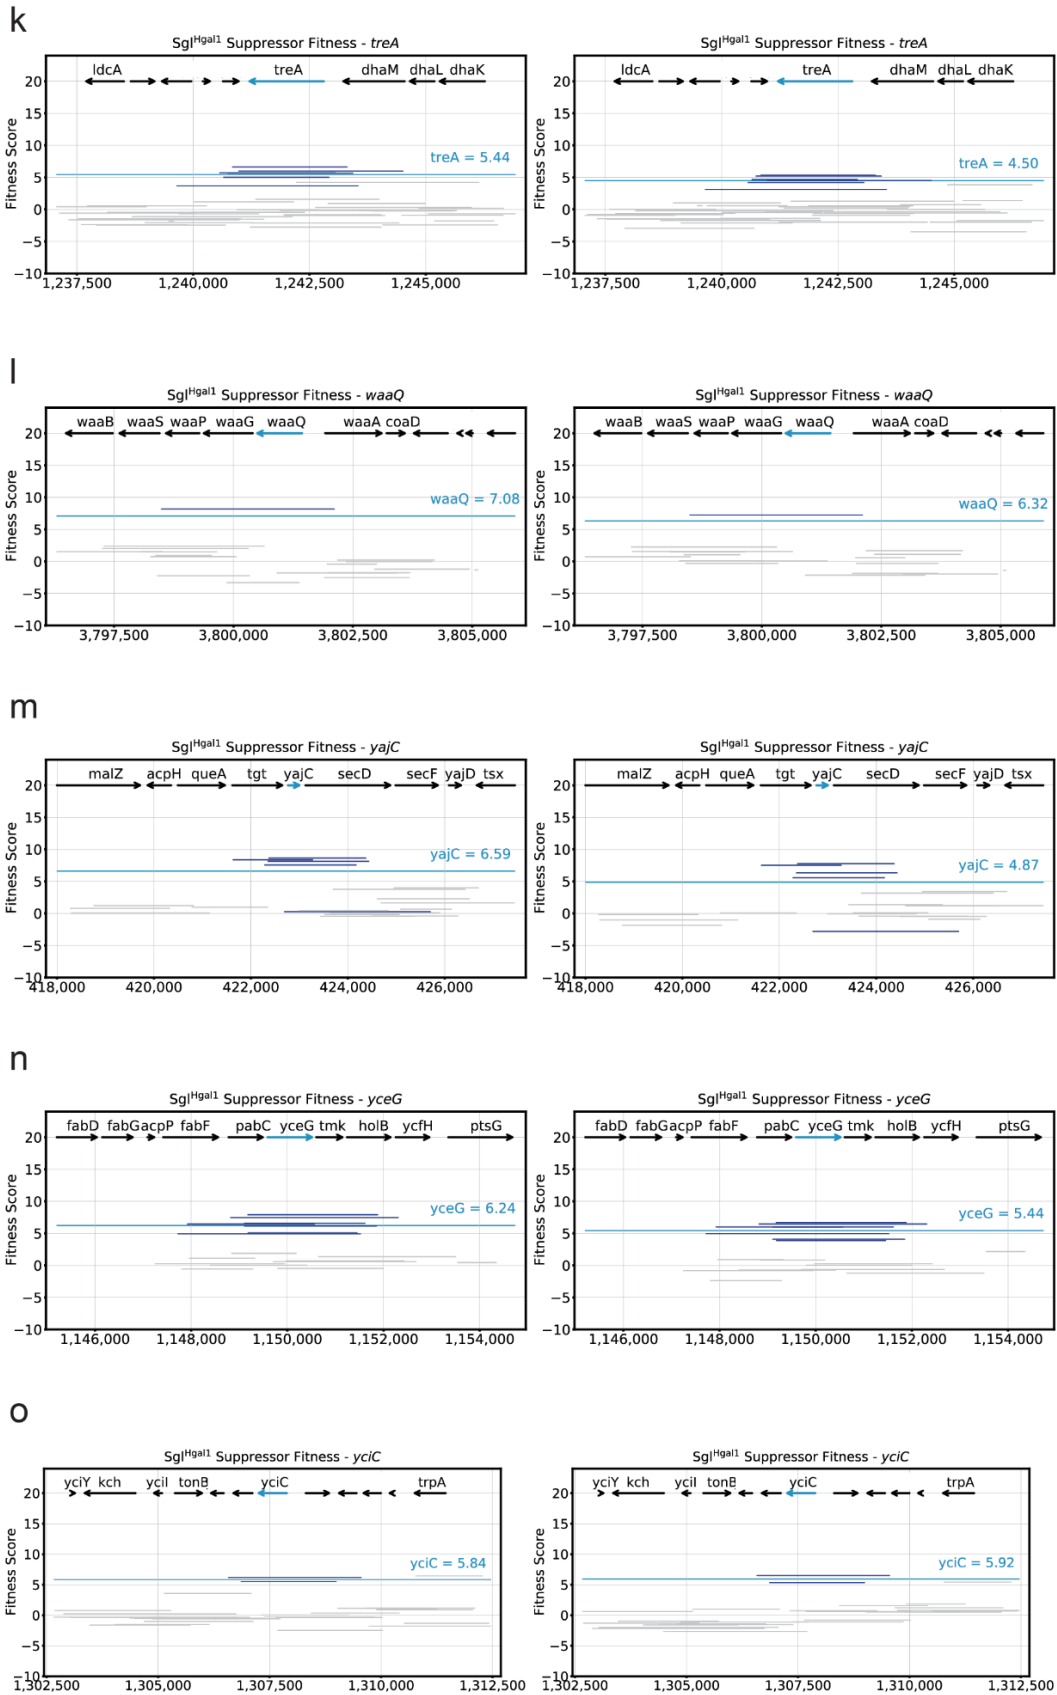



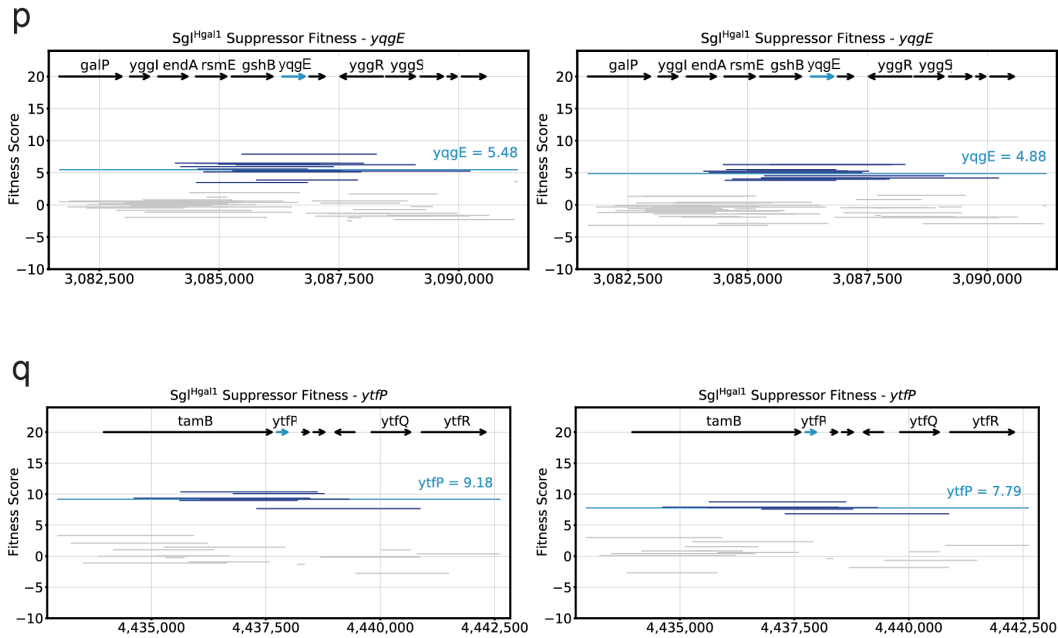

66  
67  
68  
69  
70  
71  
72  
73  
74  
75

**Supplementary Fig. 2: Detailed Dub-seq suppressor screening results against  $Sgl^{Hgal1}$ .**

(a-q) Dub-seq plots for suppressor screening against  $Sgl^{Hgal1}$  zoomed in on a gene of interest with experimental replicates shown side-by-side. Genes of interest are significant hits shown in Fig. 2 as candidate multi-gene multi-copy suppressors. Black arrows represent tracked ORFs during analysis. Teal arrows represent the gene of interest. Dark blue lines represent Dub-seq fragments covering the gene of interest with scores shown as *fcores*. Gray lines represent Dub-seq fragments that do not entirely cover the gene of interest with scores shown as *fcores*. Teal lines represent the *gscore* of the gene of interest.

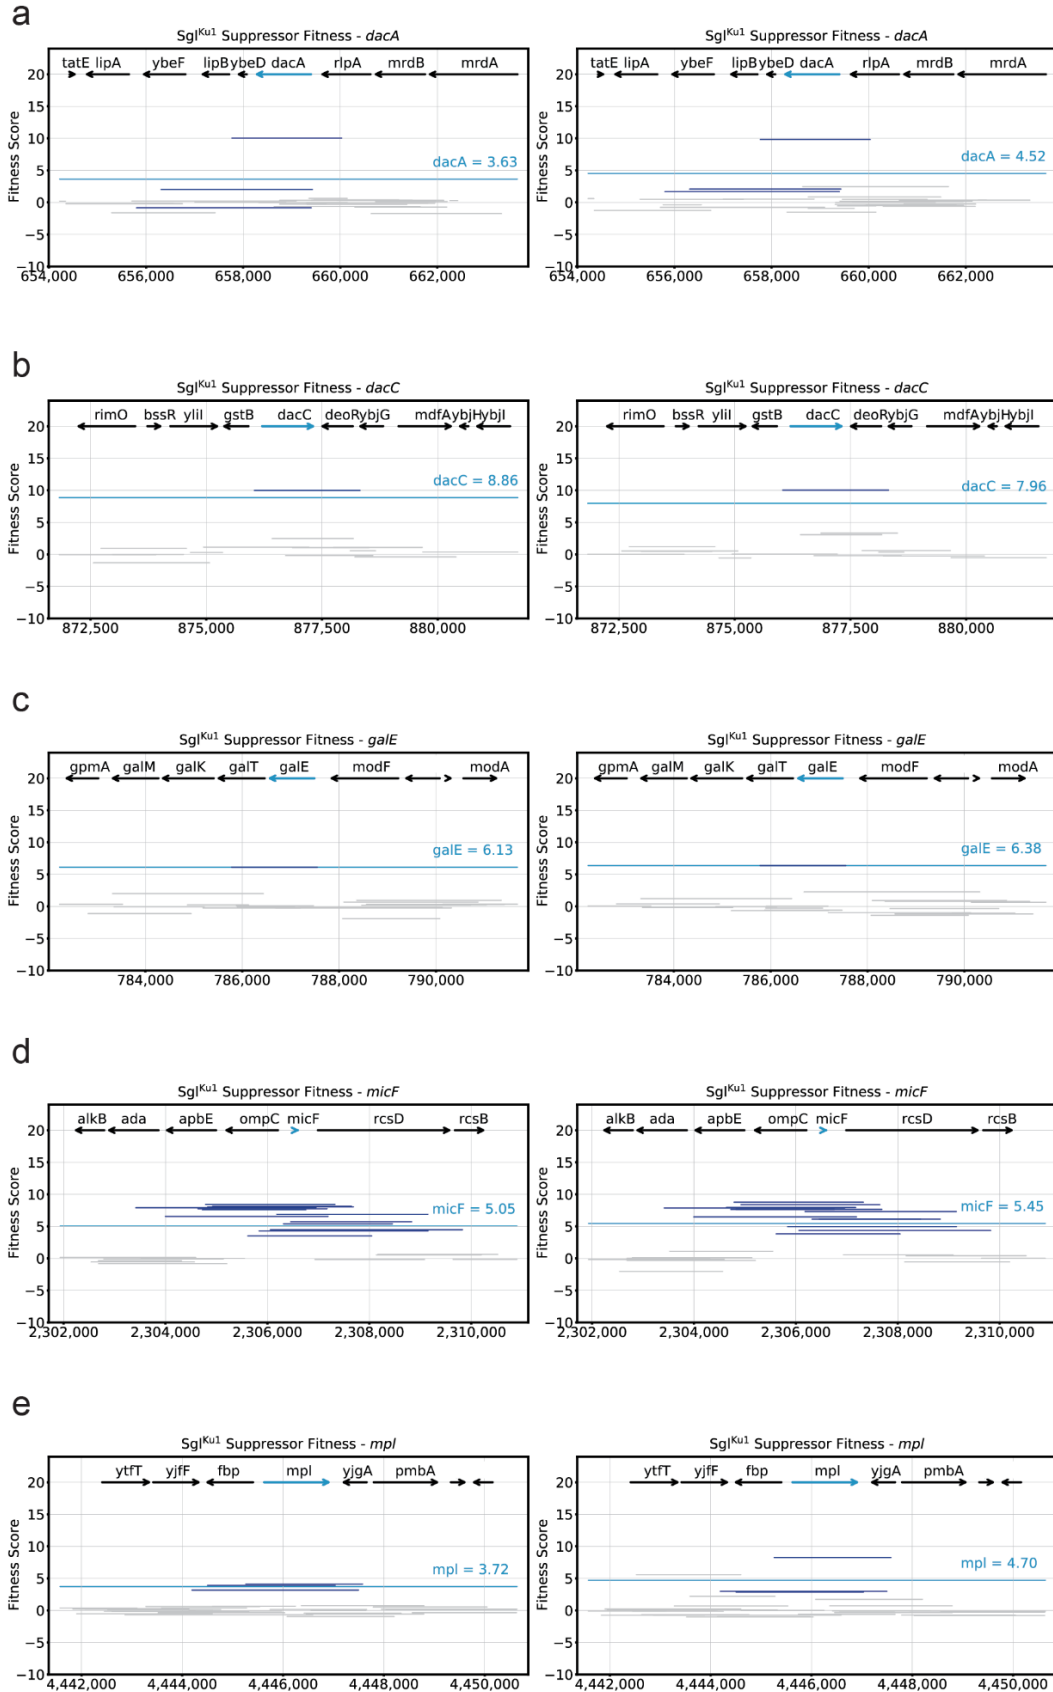

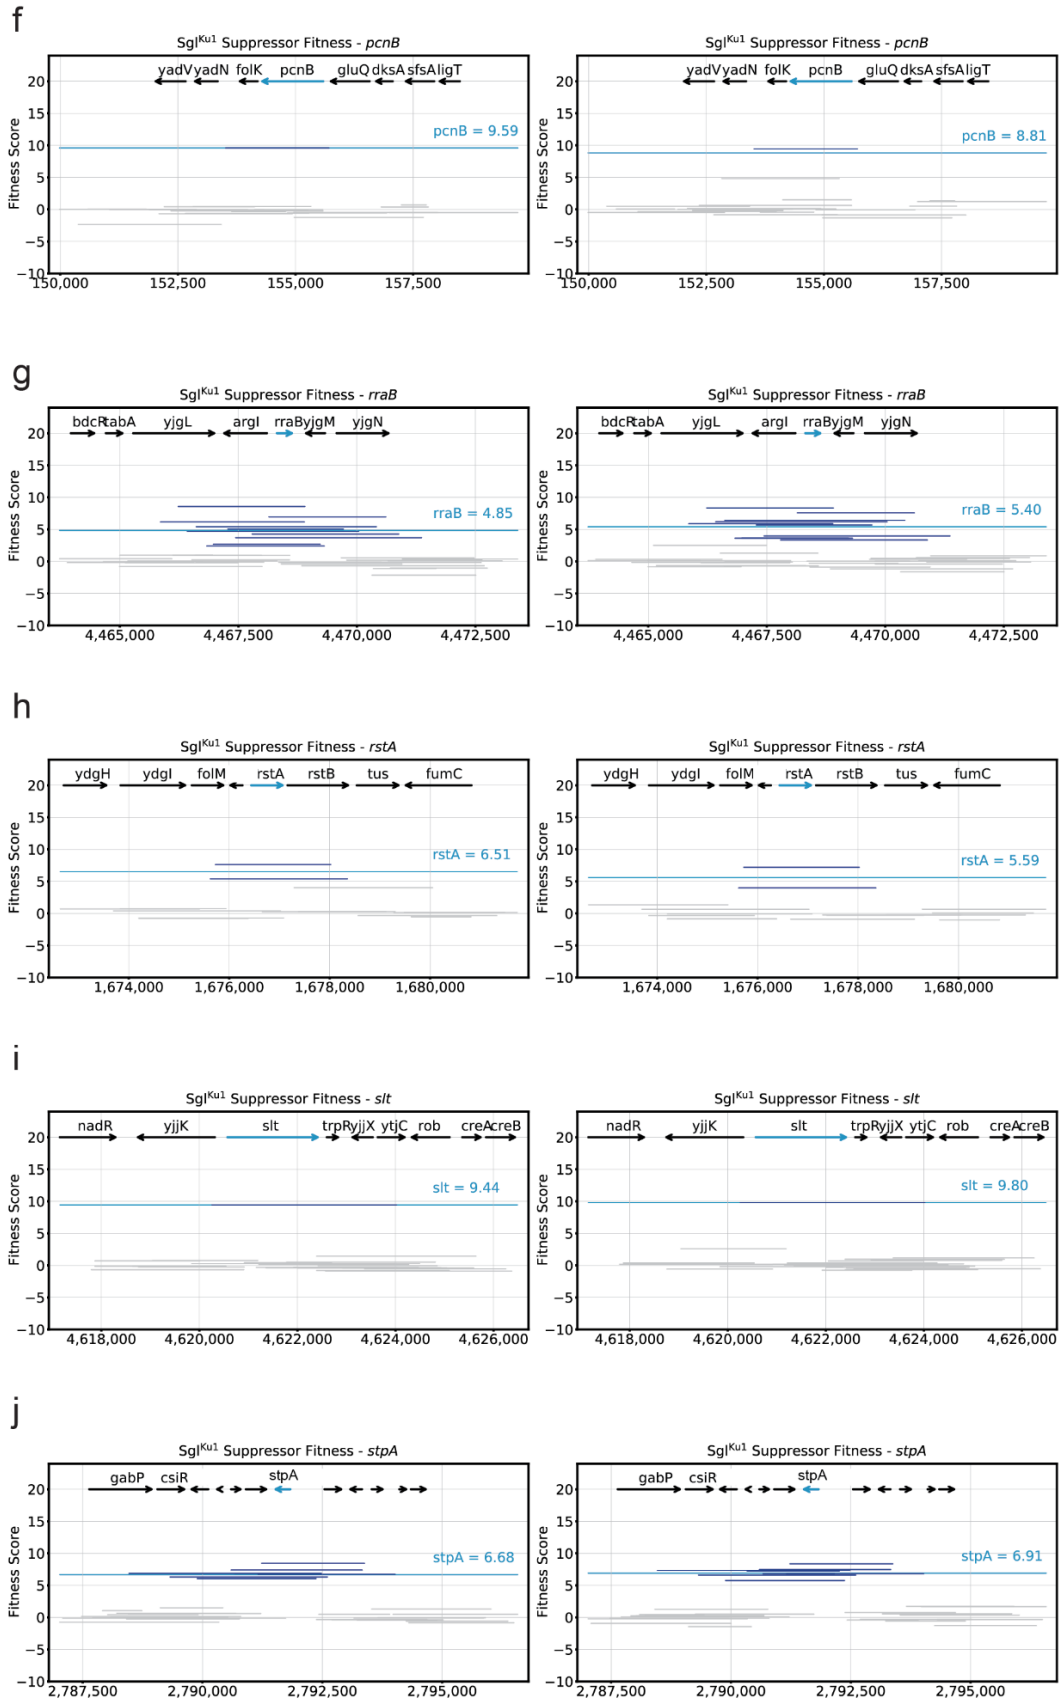

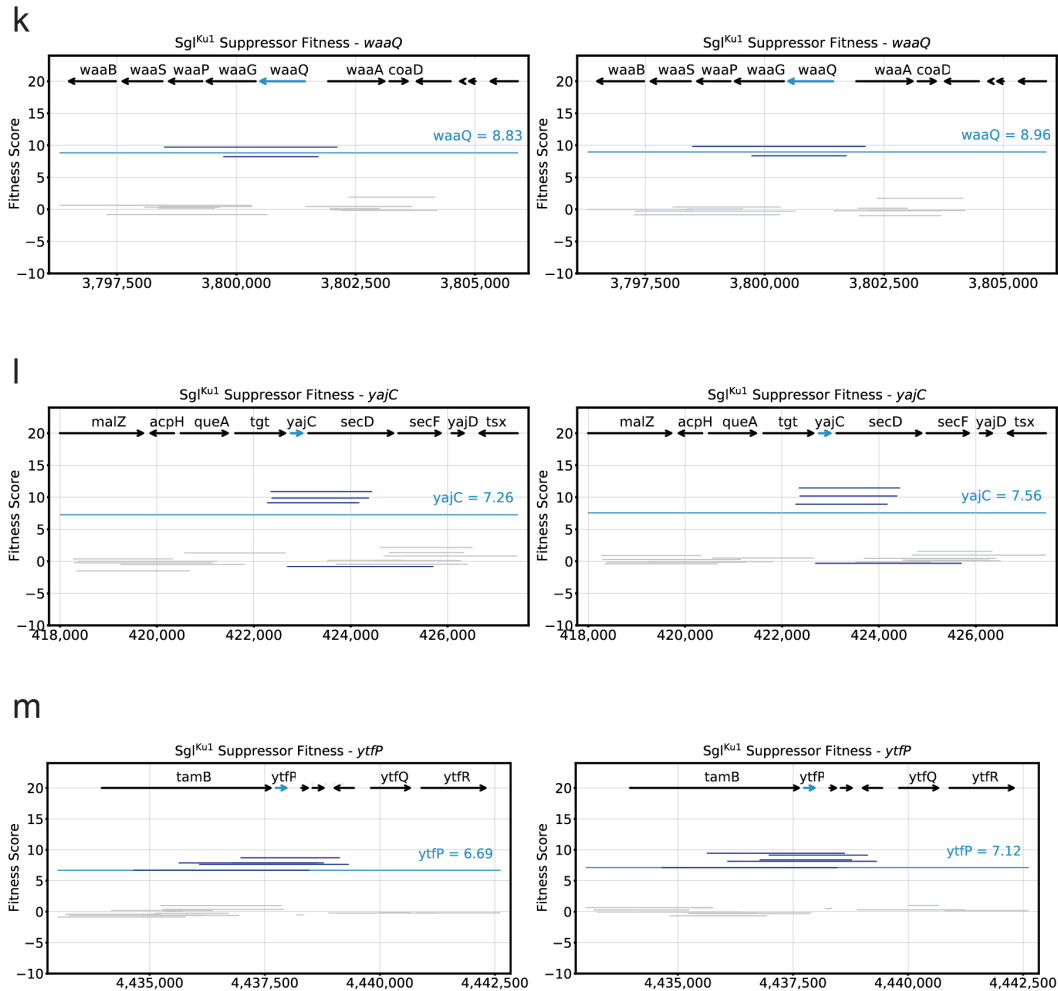

78  
79

80 **Supplementary Fig. 3: Detailed Dub-seq suppressor screening results against Sgl<sup>Ku1</sup>.**  
 81 (a-m) Dub-seq plots for suppressor screening against Sgl<sup>Ku1</sup> zoomed in on a gene of interest  
 82 with experimental replicates shown side-by-side. Genes of interest are significant hits shown in  
 83 Fig. 2 or candidate multi-gene multi-copy suppressors. Black arrows represent tracked ORFs  
 84 during analysis. Teal arrows represent the gene of interest. Dark blue lines represent Dub-seq  
 85 fragments covering the gene of interest with scores shown as *fscores*. Gray lines represent  
 86 Dub-seq fragments that do not entirely cover the gene of interest with scores shown as *fscores*.  
 87 Teal lines represent the *gscore* of the gene of interest.

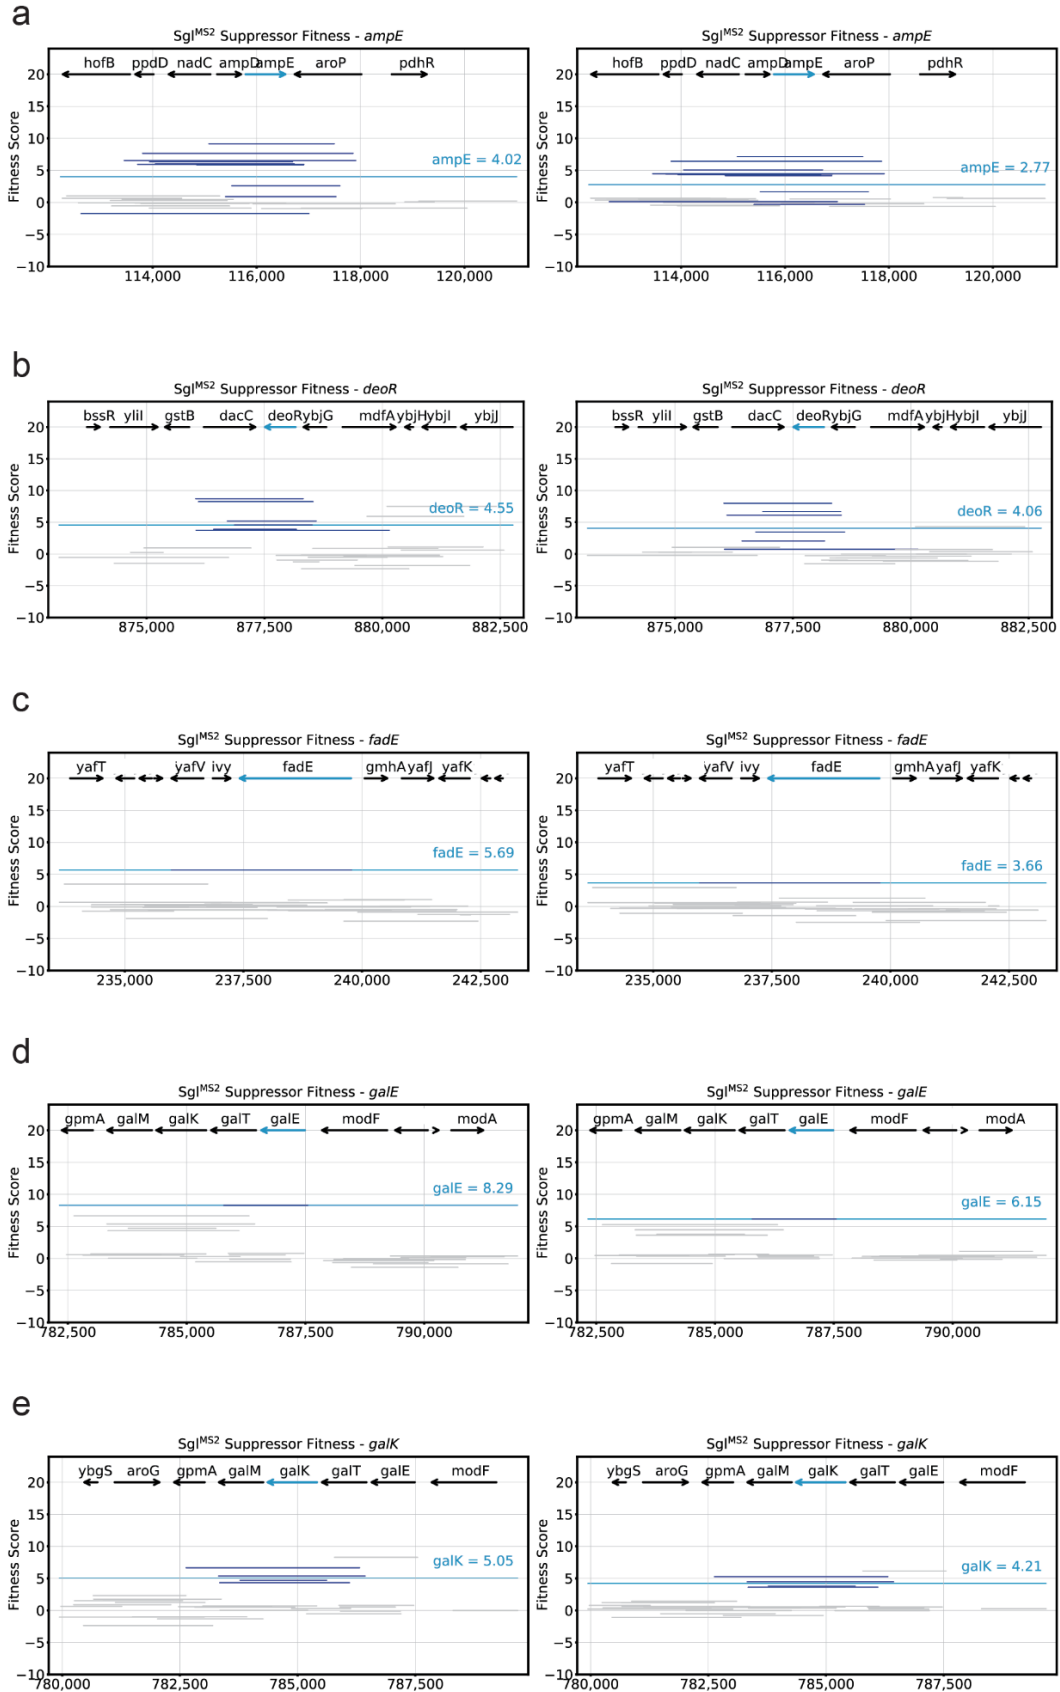

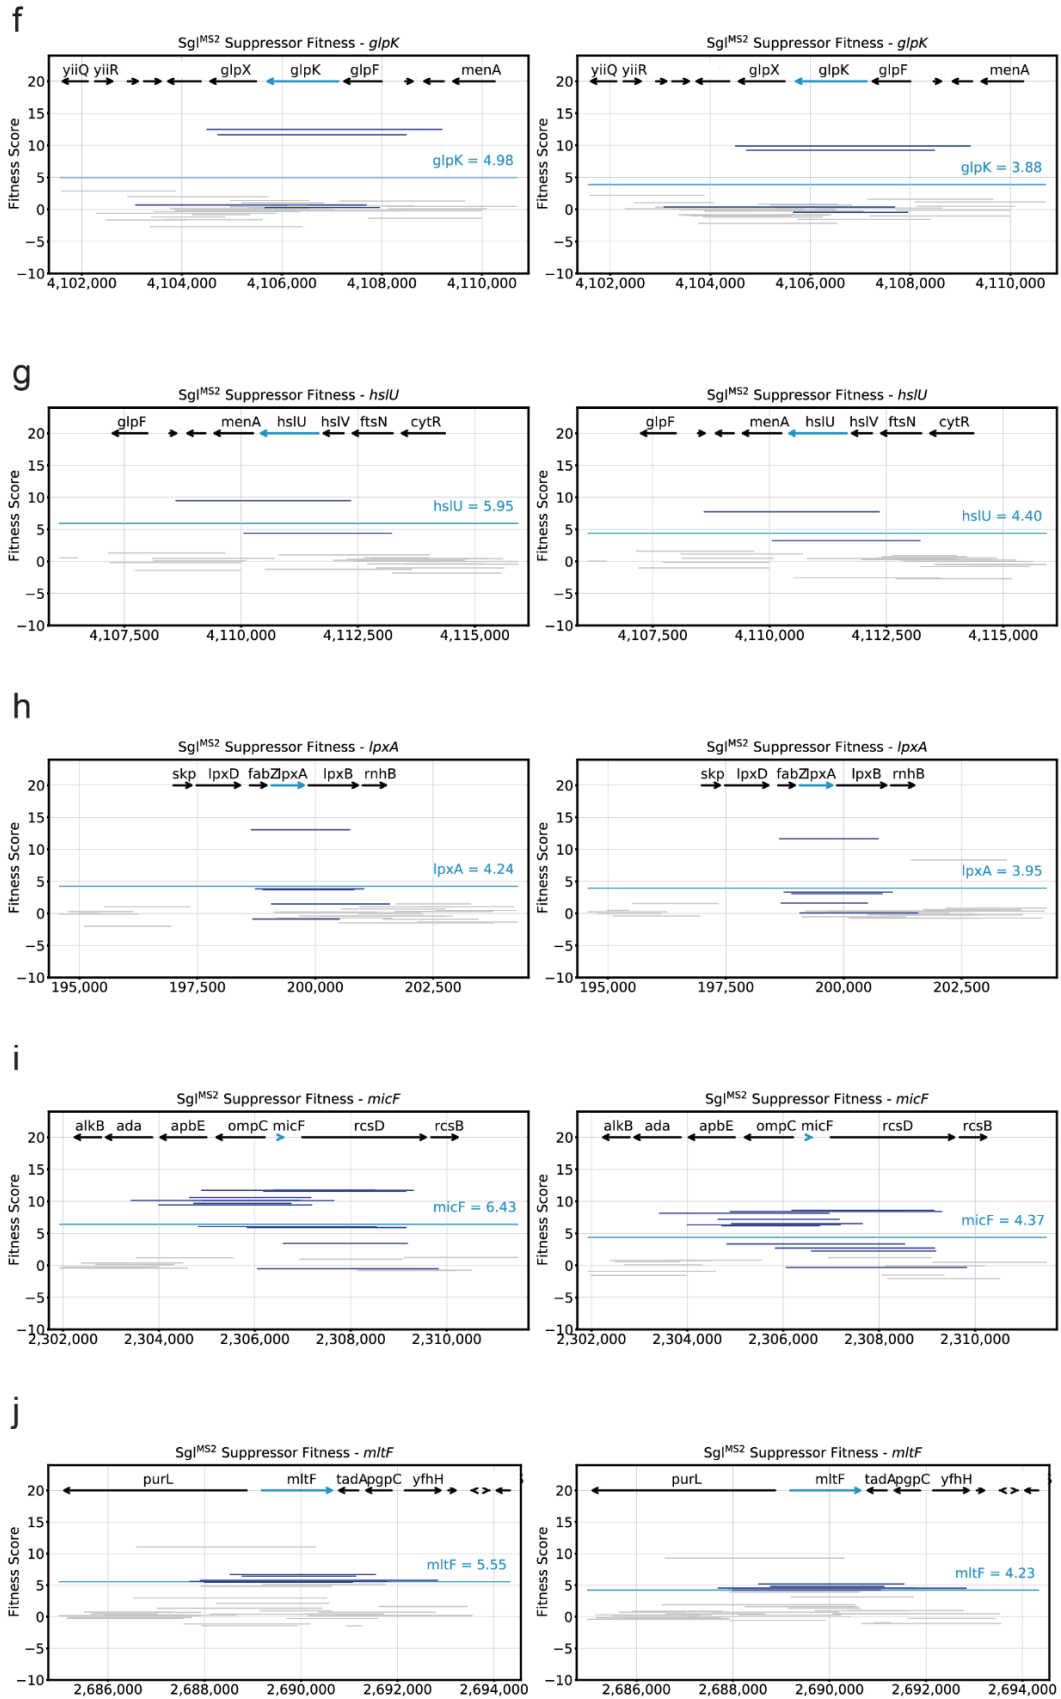

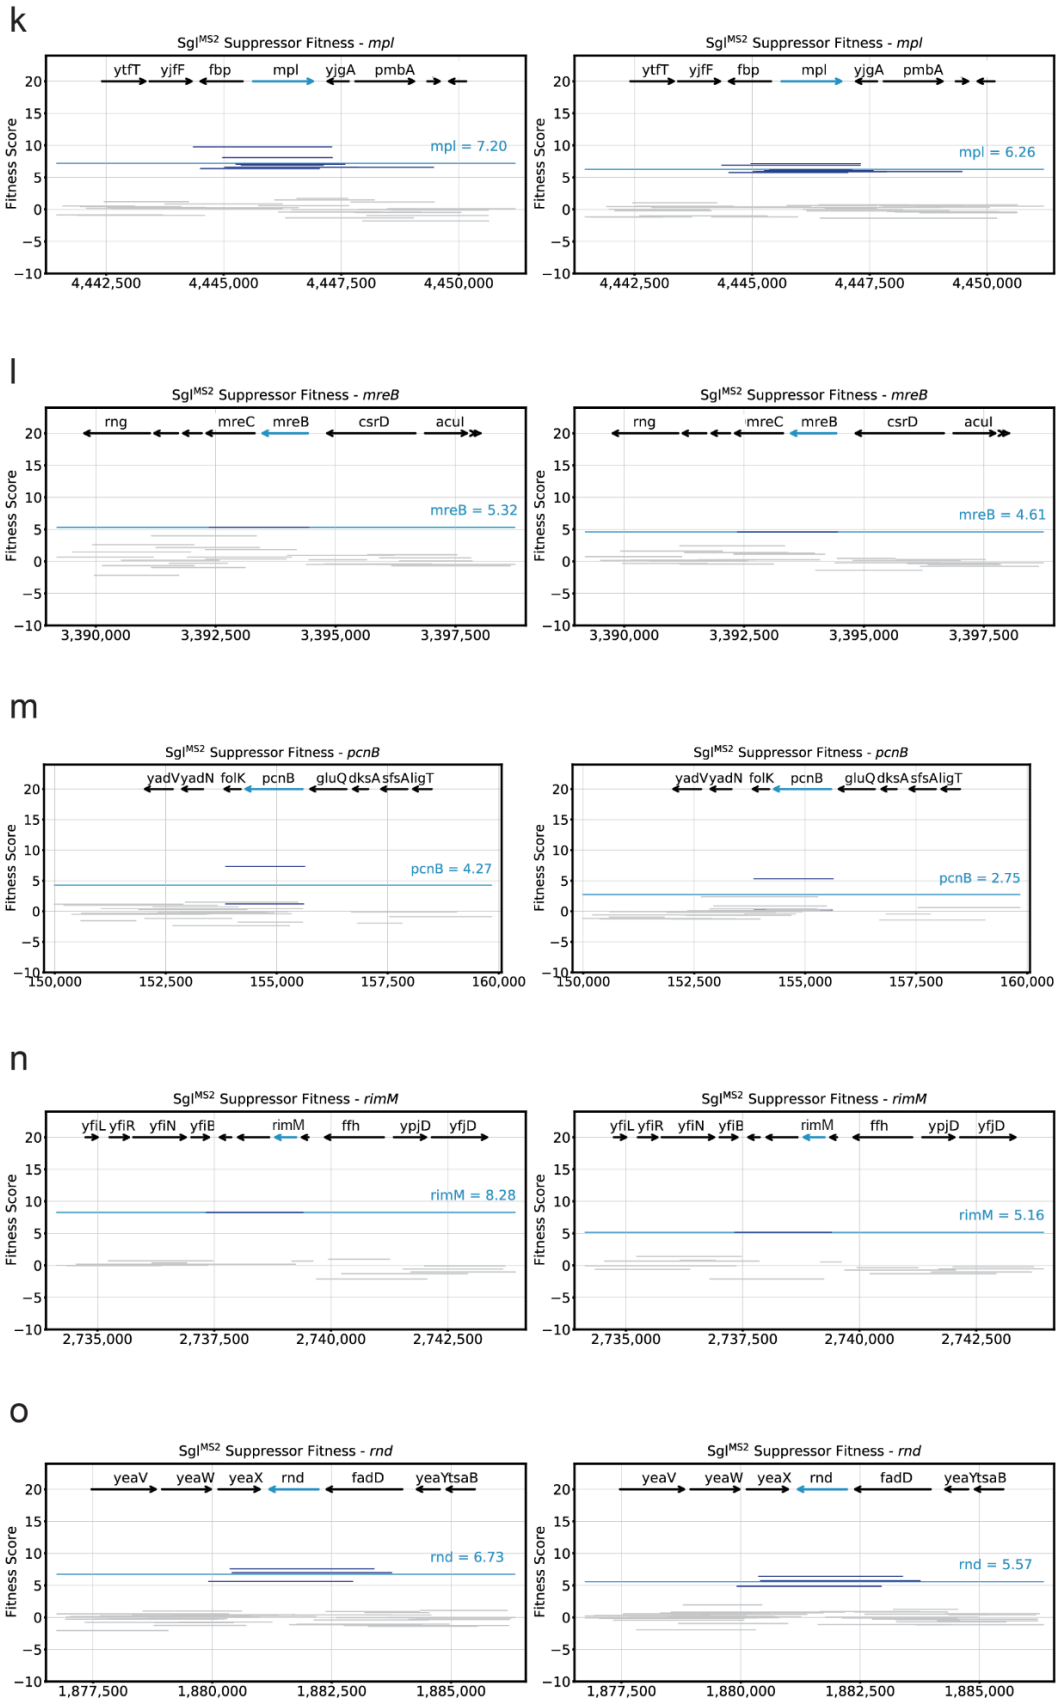

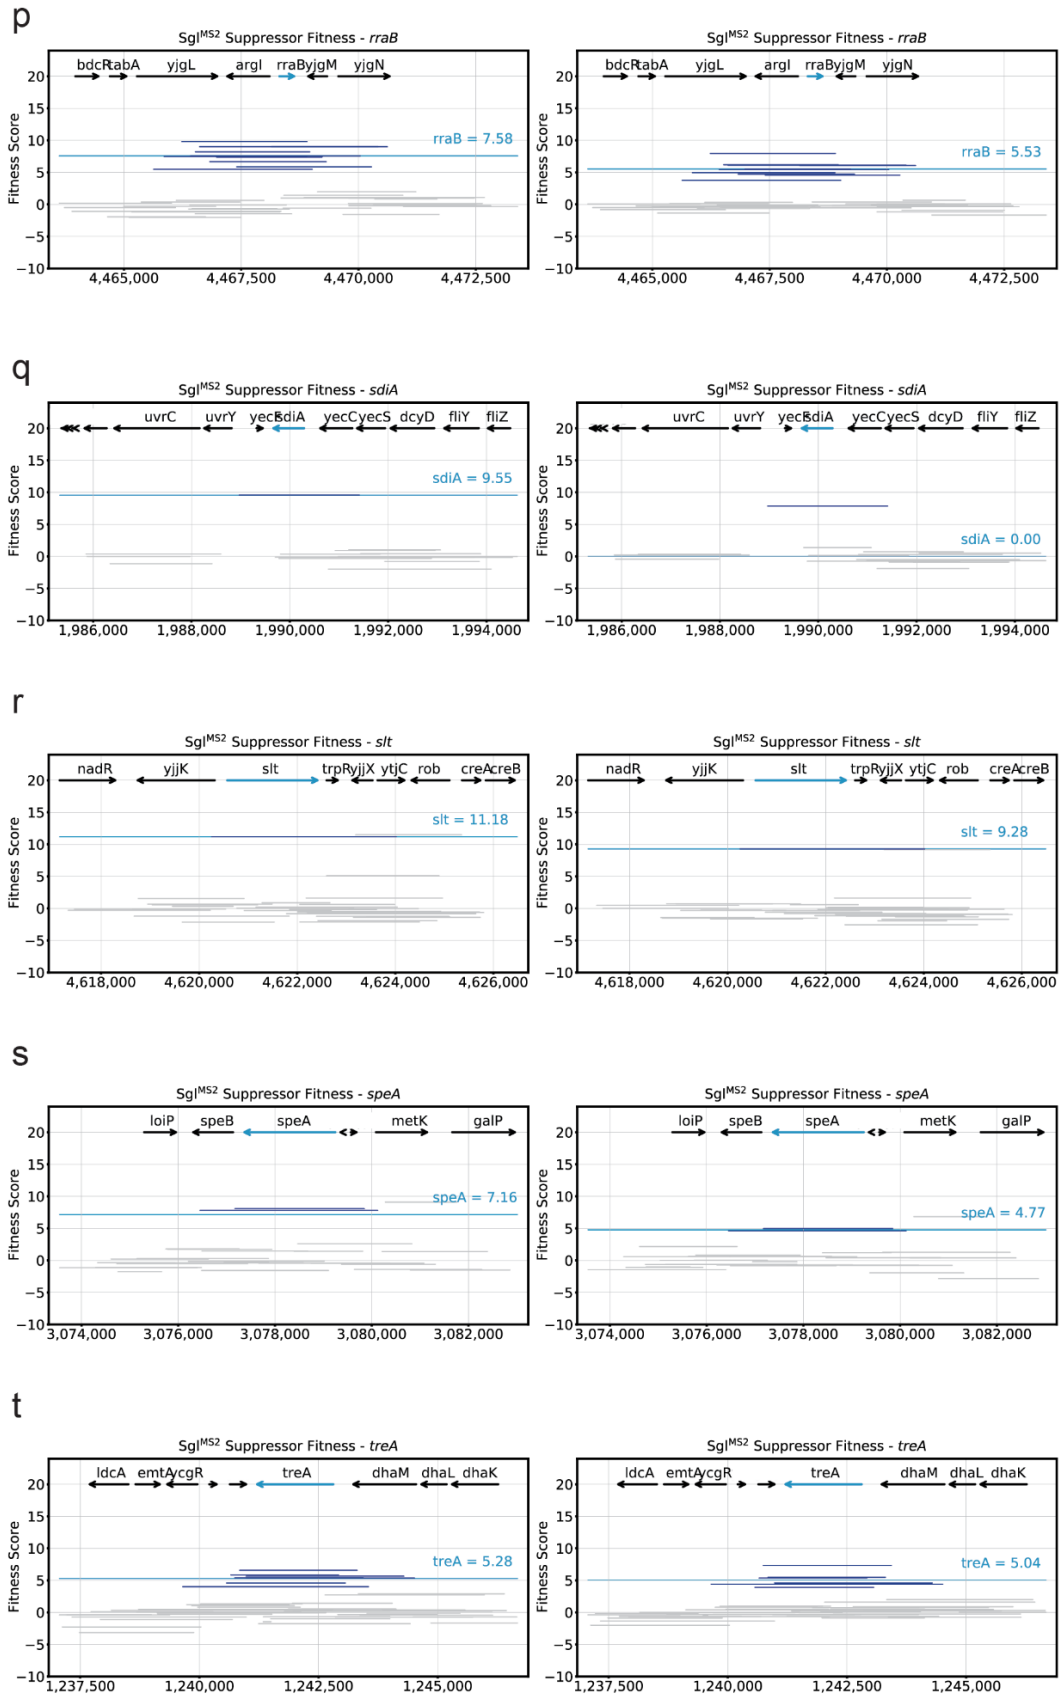



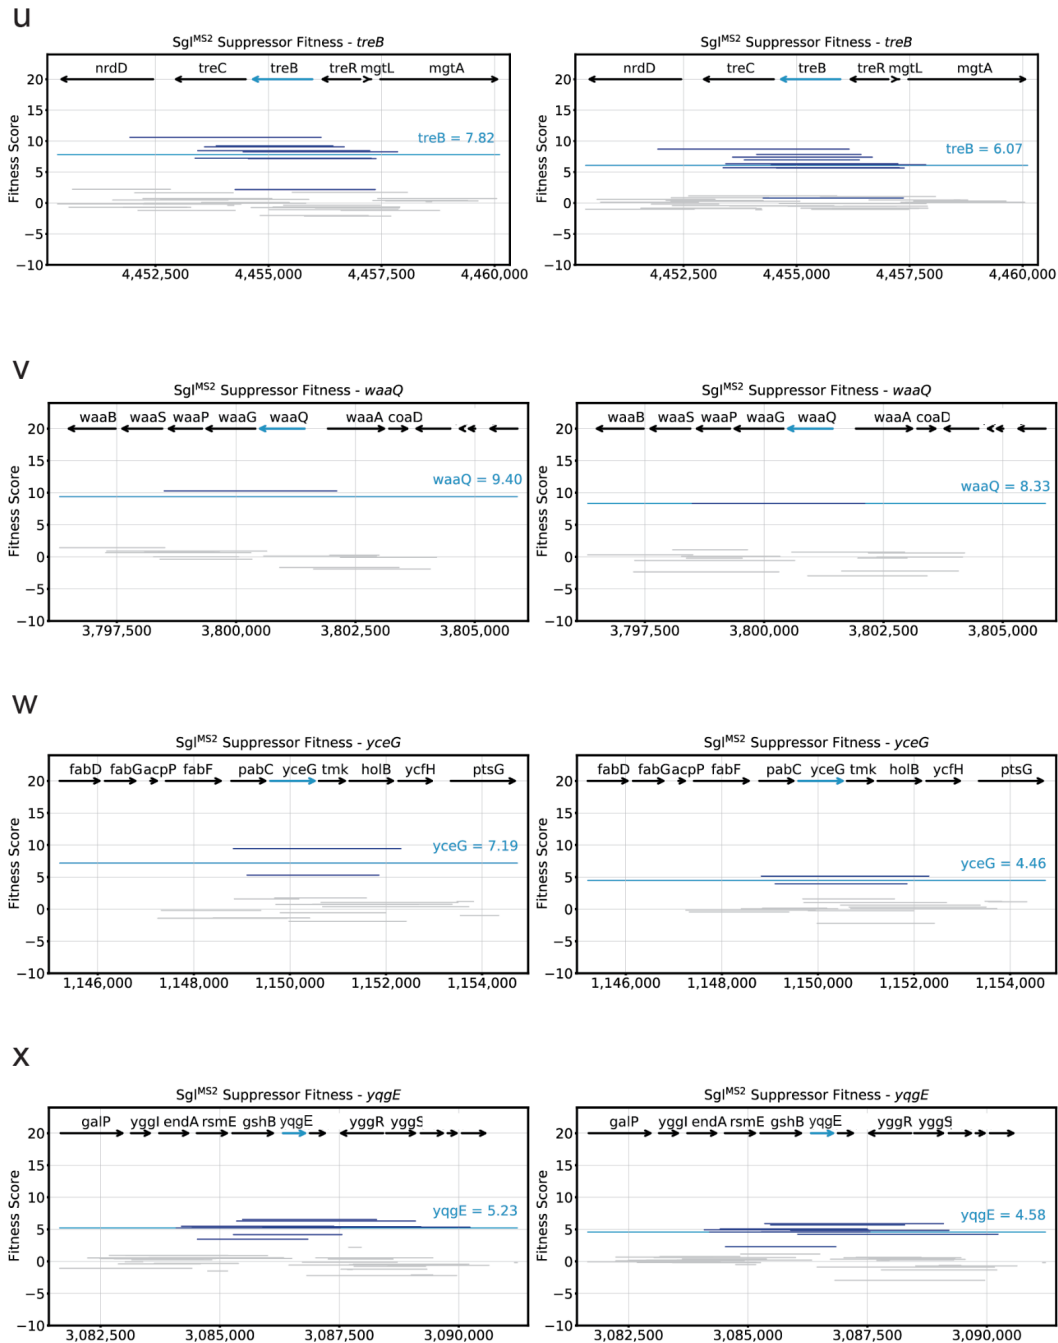

92  
93

94 **Supplementary Fig. 4: Detailed Dub-seq suppressor screening results against Sgl<sup>MS2</sup> (a-x)**  
 95 Dub-seq plots for suppressor screening against Sgl<sup>MS2</sup> zoomed in on a gene of interest with  
 96 experimental replicates shown side-by-side. Genes of interest are significant hits shown in Fig.  
 97 2 or candidate multi-gene multi-copy suppressors. Black arrows represent tracked ORFs during  
 98 analysis. Teal arrows represent the gene of interest. Dark blue lines represent Dub-seq  
 99 fragments covering the gene of interest with scores shown as *fscores*. Gray lines represent  
 100 Dub-seq fragments that do not entirely cover the gene of interest with scores shown as *fscores*.  
 101 Teal lines represent the *gscore* of the gene of interest.

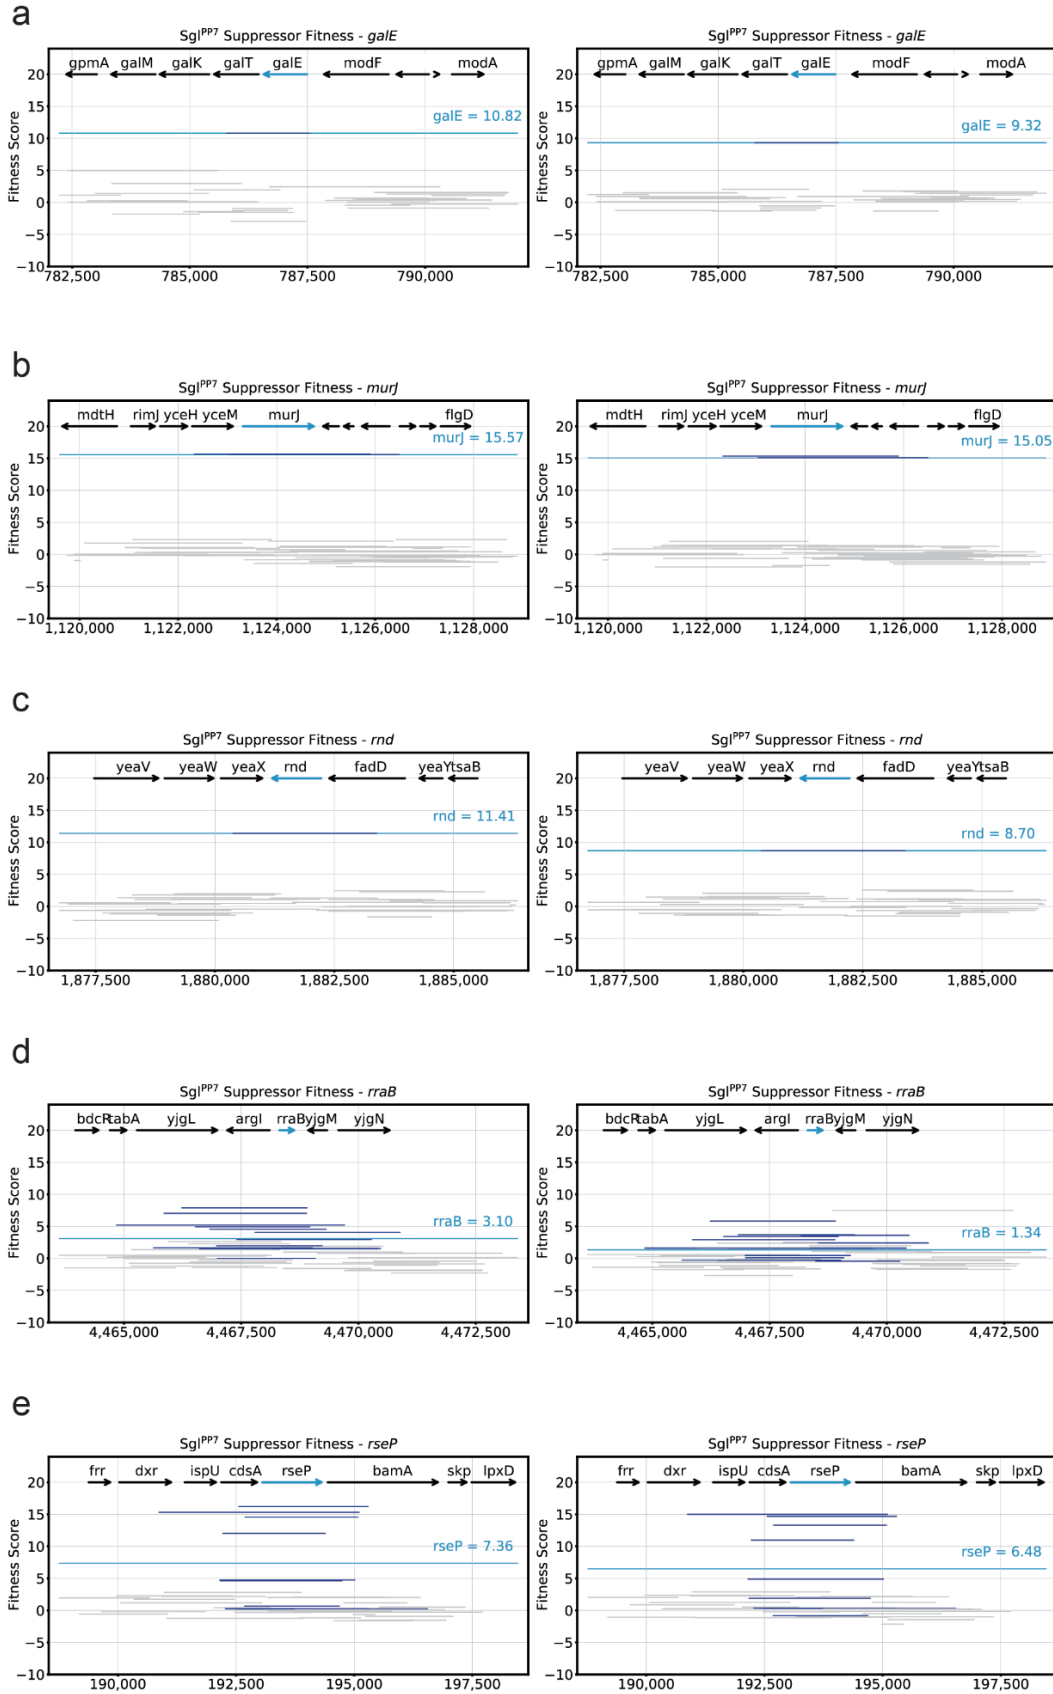

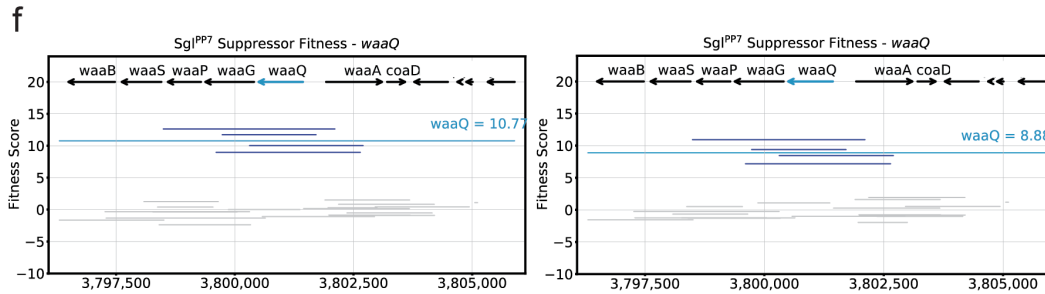

103  
104

105 **Supplementary Fig. 5: Detailed Dub-seq suppressor screening results against Sgl<sup>PP7</sup>.**  
 106 (a-f) Dub-seq plots for suppressor screening against Sgl<sup>PP7</sup> zoomed in on a gene of interest with  
 107 experimental replicates shown side-by-side. Genes of interest are significant hits shown in Fig.  
 108 2 or candidate multi-gene multi-copy suppressors. Black arrows represent tracked ORFs during  
 109 analysis. Teal arrows represent the gene of interest. Dark blue lines represent Dub-seq  
 110 fragments covering the gene of interest with scores shown as *fscores*. Gray lines represent  
 111 Dub-seq fragments that do not entirely cover the gene of interest with scores shown as *fscores*.  
 112 Teal lines represent the *gscore* of the gene of interest.

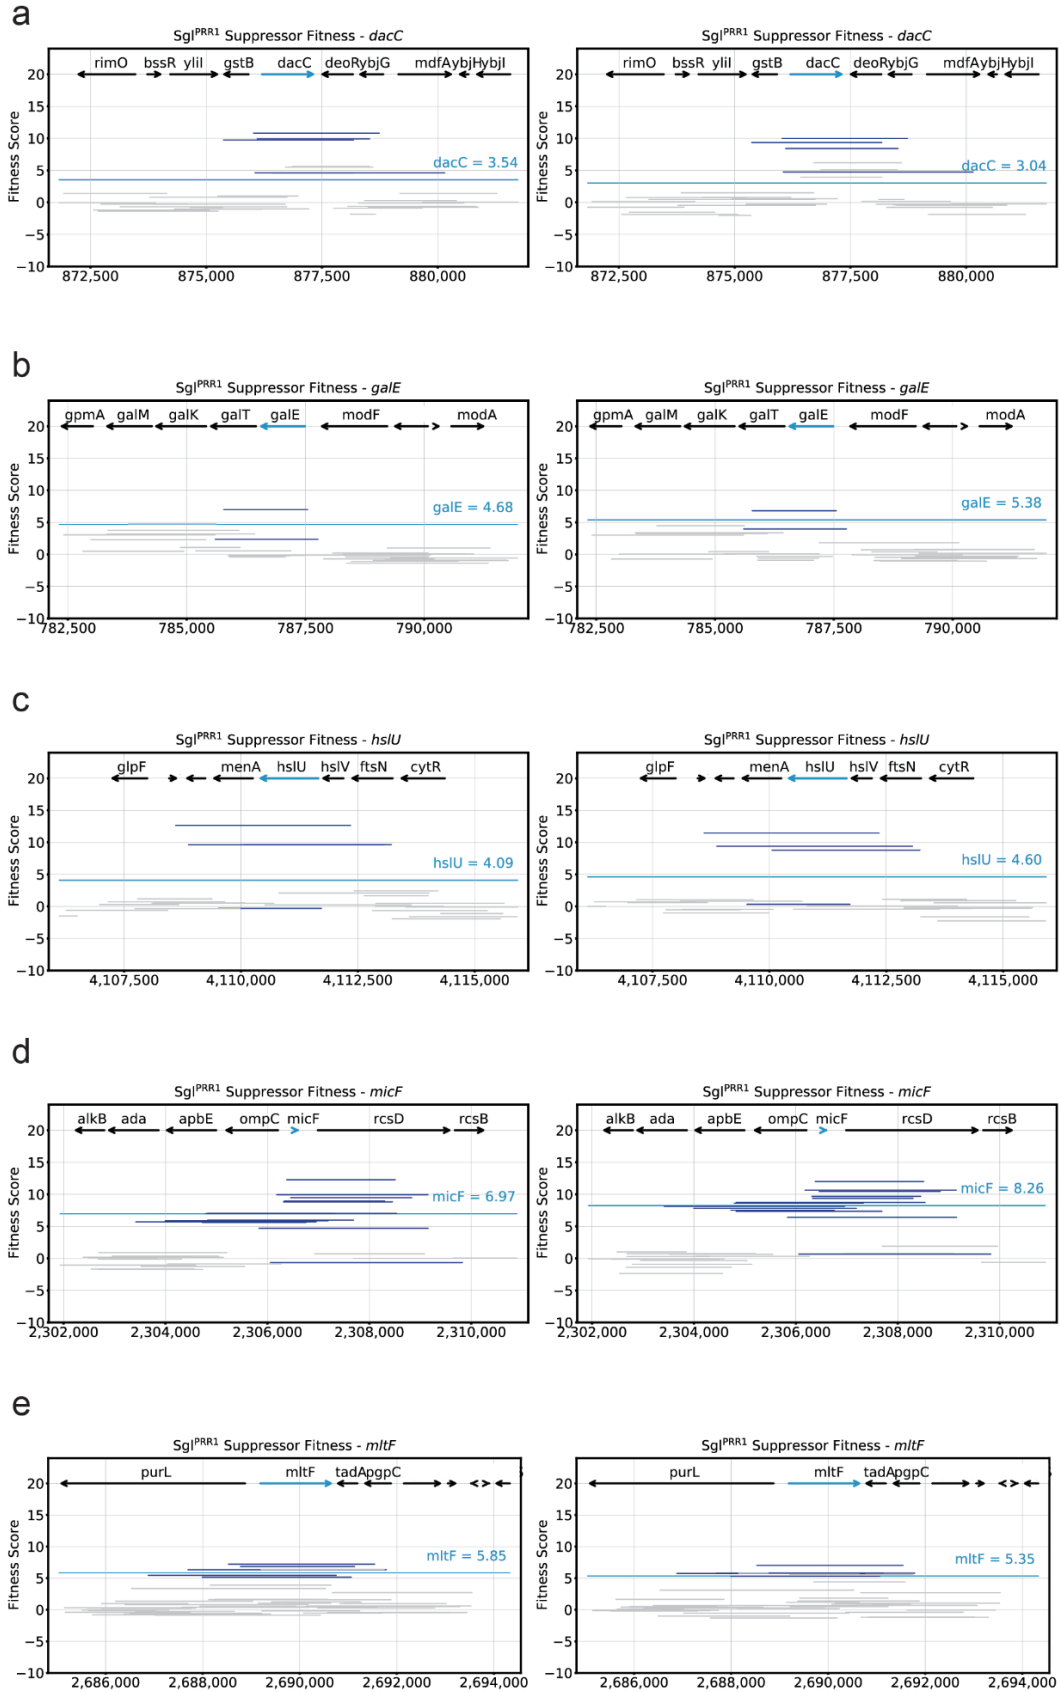

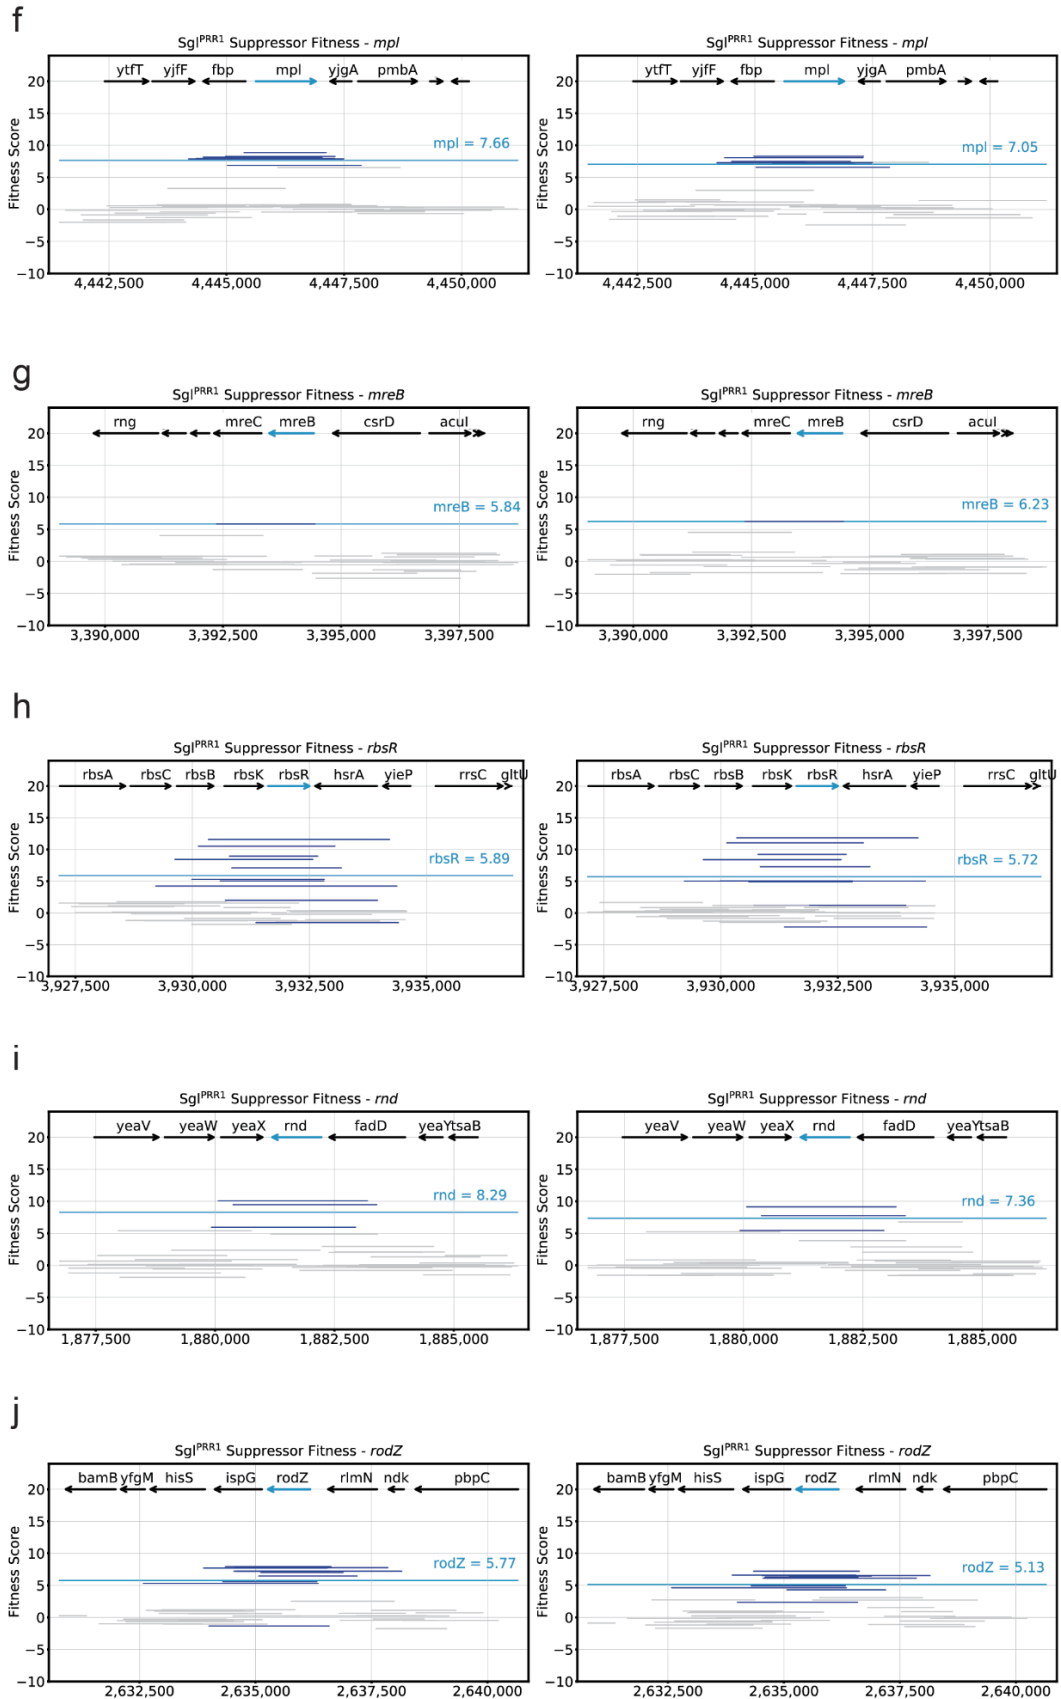

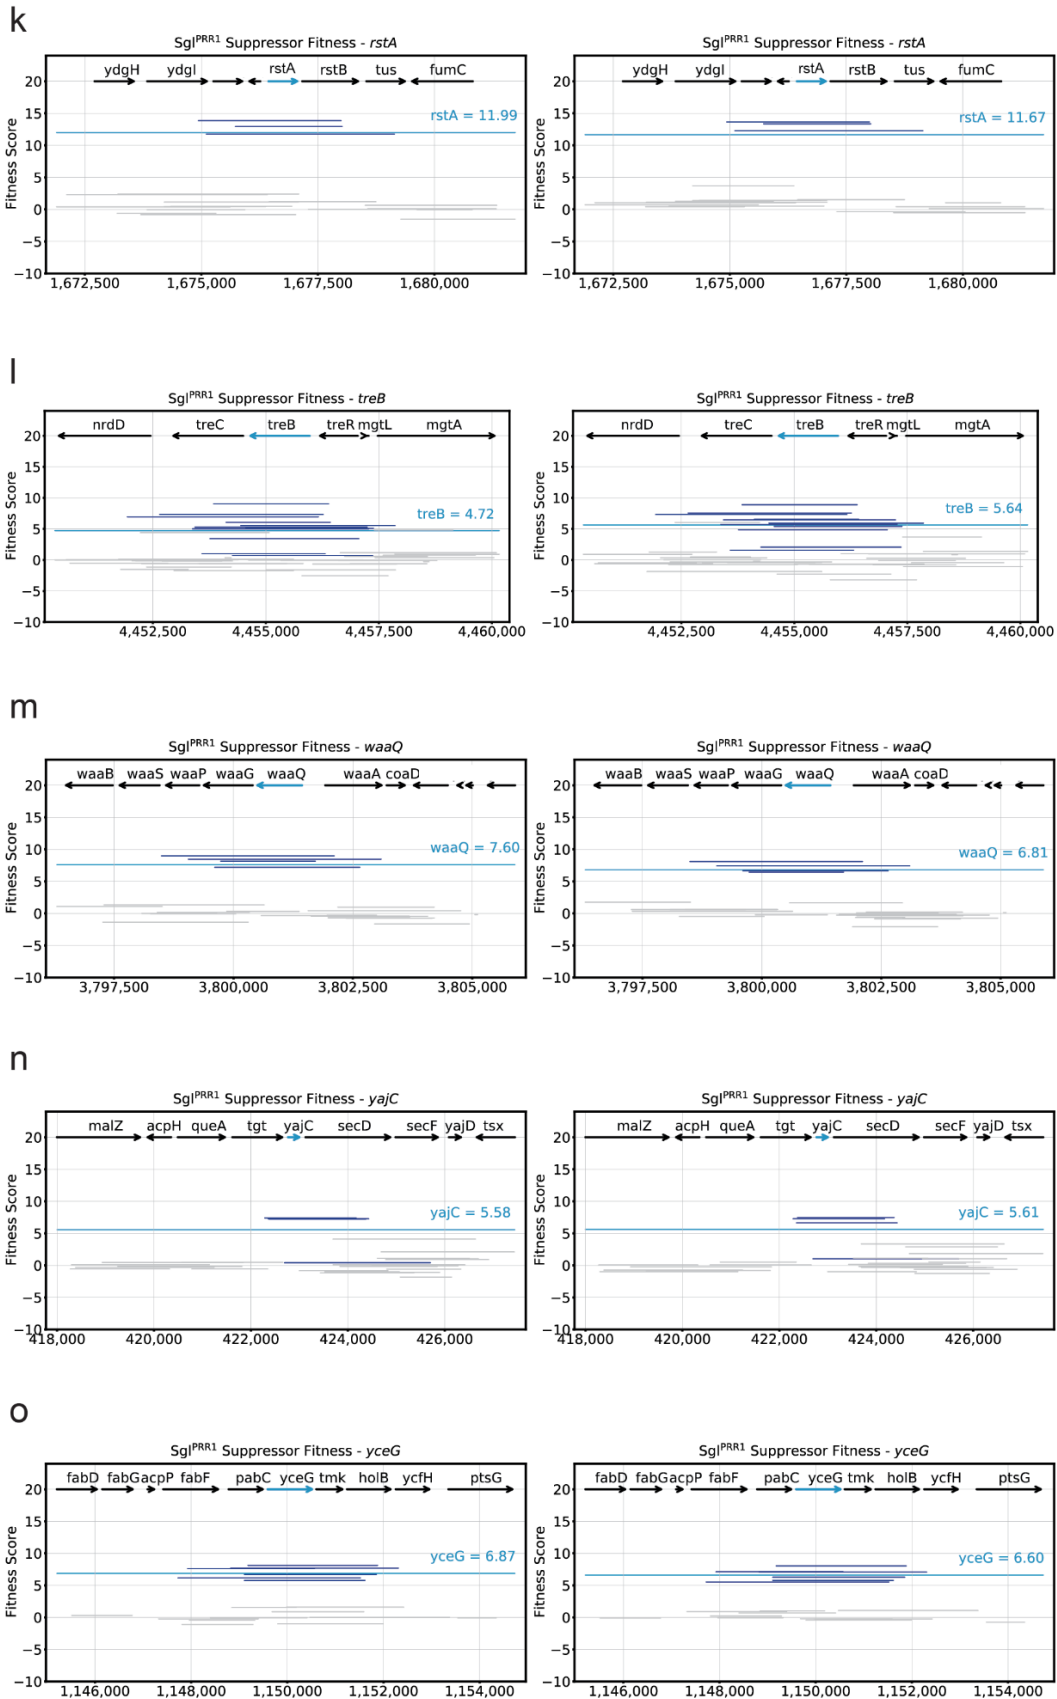

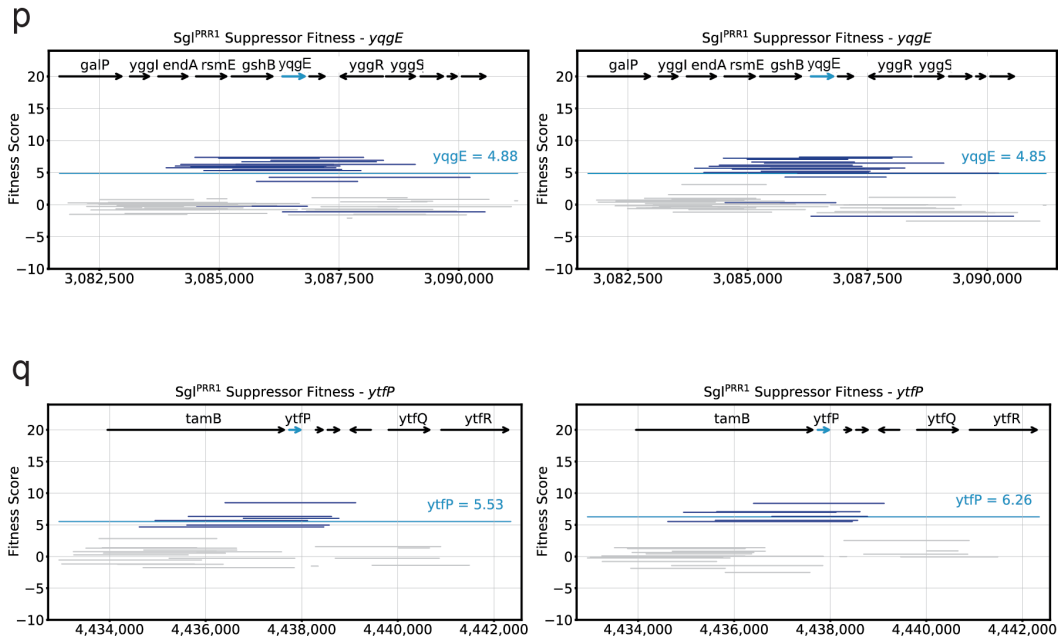

116  
 117  
 118  
 119  
 120  
 121  
 122  
 123  
 124  
 125  
 126  
 127  
 128  
 129  
 130  
 131  
 132  
 133  
 134  
 135  
 136  
 137  
 138  
 139  
 140  
 141  
 142  
 143

**Supplementary Fig. 6: Detailed Dub-seq suppressor screening results against Sgl<sup>PRR1</sup>.**  
 (a-q) Dub-seq plots for suppressor screening against Sgl<sup>PRR1</sup> zoomed in on a gene of interest with experimental replicates shown side-by-side. Genes of interest are significant hits shown in Fig. 2 or candidate multi-gene multi-copy suppressors. Black arrows represent tracked ORFs during analysis. Teal arrows represent the gene of interest. Dark blue lines represent Dub-seq fragments covering the gene of interest with scores shown as *fscores*. Gray lines represent Dub-seq fragments that do not entirely cover the gene of interest with scores shown as *fscores*. Teal lines represent the *gscore* of the gene of interest.

144  
145  
146  
147

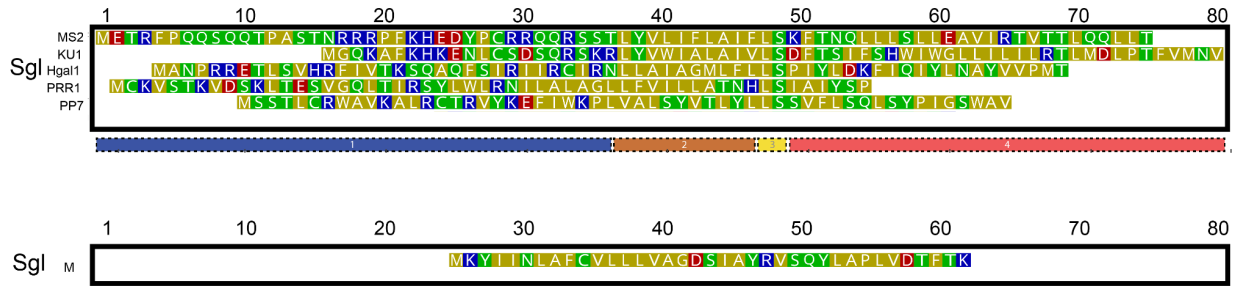

148  
149  
150  
151  
152  
153  
154  
155

**Supplementary Fig. 7: Sequence alignment of *Fiersviridae* lysis proteins.** *Fiersviridae* lysis proteins bear little resemblance to each other. The L-like Sgl sequences were centered on the LS motif (Top panel). Domains proposed for L-like Sgl previously (PMID: 28691656) are outlined at the bottom of the diagram. Briefly, domain 1 (Blue) refers to the variable-length, positively charged N-terminus, domain 2 (Brown) refers to the LS-preceding hydrophobic region, domain 3 (yellow) refers to the L-like conserved LS motif, and domain 4 (red) refers to the highly variable C-terminus. For comparison, Sgl<sup>M</sup> sequence is also shown at the bottom panel.
